# Supplementary material for: Clinical validation of a public health policy-making platform for hearing loss (EVOTION): protocol for a big data study
Source: PubMed Central journal article supplement — BMJ Open. 2018 Feb 15;8(2):e020978. doi: 10.1136/bmjopen-2017-020978 (PMC5829902; doi:10.1136/bmjopen-2017-020978), 2018-02-15
Supplement: bmjopen-2017-020978.reviewer_comments.pdf [file bmjopen-2017-020978.reviewer_comments.pdf]

## PEER REVIEW HISTORY

BMJ Open publishes all reviews undertaken for accepted manuscripts. Reviewers are asked to complete a checklist review form (<http://bmjopen.bmj.com/site/about/resources/checklist.pdf>) and are provided with free text boxes to elaborate on their assessment. These free text comments are reproduced below.

## ARTICLE DETAILS

|                            |                                                                                                                                                                                          |
|----------------------------|------------------------------------------------------------------------------------------------------------------------------------------------------------------------------------------|
| <b>TITLE (PROVISIONAL)</b> | Clinical Validation of a Public Health Policy Making Platform for Hearing Loss (EVOTION): Protocol for a Big Data Study                                                                  |
| <b>AUTHORS</b>             | Dritsakis, Giorgos; Kikidis, Dimitris; Koloutsou, Nina; Murdin, Louisa; Bibas, Athanasios; Ploumidou, Katherine; Laplante-Lévesque, Ariane; Pontoppidan, Niels Henrik; Bamiou, Doris-Eva |

This article was not externally reviewed at BMJ Open. Protocols that have been independently assessed prior to submission to BMJ Open are usually fast-tracked to publication on the grounds that further substantial changes will not be possible. This independent assessment will usually be external, independent review for both a substantial grant award from a non-commercial or government funder and ethics approval.
